# Supplementary material for: First-Principles Investigation of the Adsorption Behaviors of CH2O on BN, AlN, GaN, InN, BP, and P Monolayers
Source: MDPI journal article supplement (doi:10.3390/ma12040676), 2019-02-25
Supplement: s1 [file s1]

## Supplementary Materials

# First-Principles Investigation of the Adsorption Behaviors of CH<sub>2</sub>O on BN, AlN, GaN, InN, BP, and P Monolayers

Chuang Feng <sup>1</sup>, Hongbo Qin <sup>1,\*</sup>, Daoguo Yang <sup>1</sup> and Guoqi Zhang <sup>1,2</sup>

<sup>1</sup> School of Mechanical and Electronic Engineering, Guilin University of Electronic Technology, Guilin, 541004, China; 1601201020@mails.guet.edu.cn (C.F.); d.g.yang@guet.edu.cn (D.Y.)

<sup>2</sup> EEMCS Faculty, Delft University of Technology, Delft 2628, The Netherlands; g.q.zhang@tudelft.nl (G.Z.)

\* Correspondence: qinhb@guet.edu.cn; Tel.: +86-773-2290108;

Received: 29 January 2019; Accepted: 18 February 2019; Published: 25 February 2019

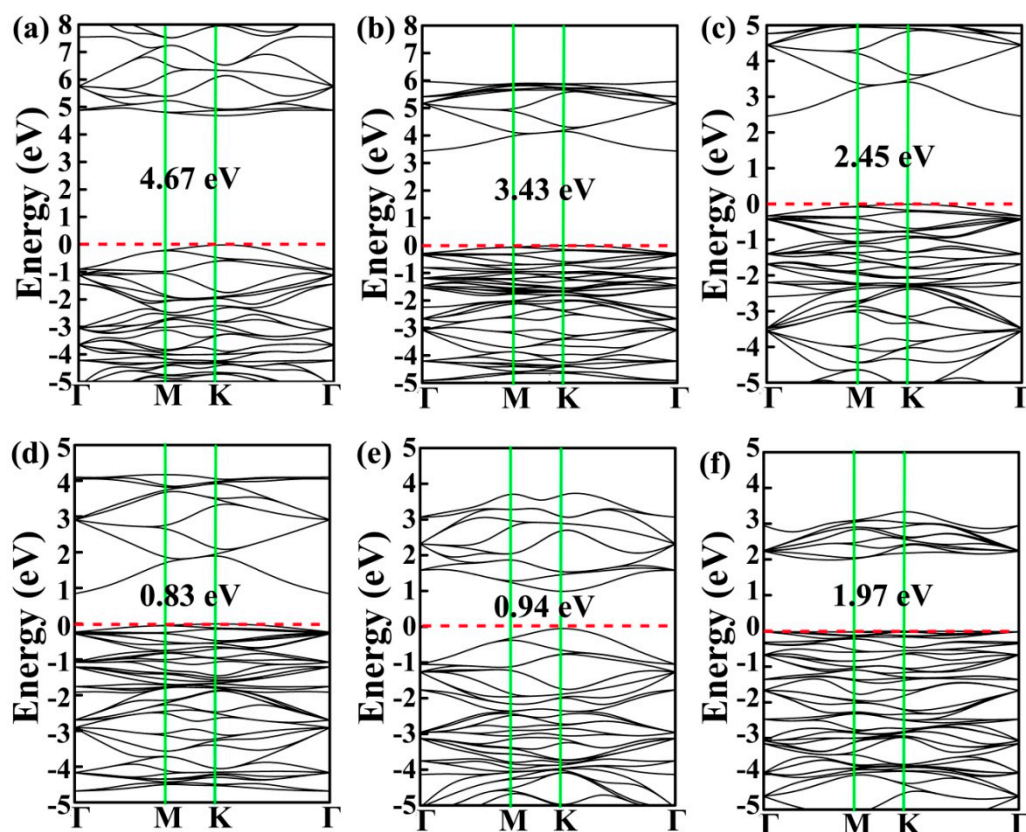

**Figure S1.** Band structures of pristine (a) BN, (b) AlN, (c) GaN, (d) InN, (e) BP, and (f) P monolayers.
